1 **Trans-generational effect of protein restricted diet on adult body and wing size of**

2 *Drosophila melanogaster*

3 Sudhakar Krittika<sup>1</sup>, Pankaj Yadav<sup>1\*</sup>

4  
5 <sup>1</sup> Fly Laboratory # 210, Anusandhan Kendra-II, School of Chemical & Biotechnology, SASTRA  
6 Deemed to be University, Thanjavur-613401, Tamil Nadu, India.

7  
8 **Running title:** Effect of protein restrictions in *Drosophila*.

9  
10  
11  
12  
13 Orcid ID- 0000-0003-0733-5375- Sudhakar Krittika

14 Orcid ID- 0000-0003-2246-305X- Pankaj Yadav

15  
16  
17 E-mails- krittikacbe@gmail.com; pankajyadav@scbt.sastra.edu

18  
19 **\*Corresponding author:** E-mail- ypankaj1451981@gmail.com

20 Phone: +91-4362-264101 (3769 Ext.); Fax: +91-4362-264120

24 **Abstract:**

25 Dietary Restriction (DR) via protein restriction (PR) has turned out to be a very inquisitive field  
26 as past studies opened about the feasible trade-offs between various fitness and behavioral traits  
27 in *Drosophila melanogaster* to understand lifespan or aging in a nutritionally challenged  
28 environment. However, the phenotypes of body size, weight and wing length respond according  
29 to the factors such as flies' genotype, environmental exposure and parental diet. Hence,  
30 understanding the long-term effect of PR on these phenotypes is essential. Here, we demonstrate  
31 the effect of PR diet on body size, weight and normal & dry wing length of flies subjected to  
32 PR50 & PR70 (50% & 70% protein content present in control food respectively) for 20  
33 generations from the pre-adult stage. We found that the PR fed flies have lower body weight,  
34 relative water content (in males), smaller normal & dry body size as compared to its control and  
35 generations 1 & 2. Interestingly, the wing size of PR flies and the pupal size of PR70 flies are  
36 smaller and also showed significant effects of diet and generation. Thus, these traits are sex and  
37 generation dependent along with an interaction of diet, which is capable of modulating these  
38 results variably. Our study suggests that the trans-generational effect is more prominent in  
39 influencing these traits and moreover wing length might not be a predictor for body size. Taken  
40 together, the trans-generational effect of dietary protein restriction on fitness and fitness-related  
41 traits might be helpful to understand the underpinning mechanisms pertaining to evolution and  
42 aging in fruit flies *D. melanogaster*.

43 **Keywords:** *Drosophila*, protein restriction, selection, life-history traits, trans-generational effect.

44

45

46

47

48

49

50

## 51 **Introduction:**

52 Organisms vary in body size not only across species, but also within a particular species. The  
53 variations in the body composition can influence phenotypic traits like body size, body weight  
54 etc., while these trait variations can be attributed to various environmental and genetic factors 1-  
55 3]. The environmental factors that can influence organismal body size and weight, including  
56 wing length (especially in insects) can be nutrition [4], temperature [5-6], crowding [4, 7],  
57 latitudinal clines [8] and certain cases of laboratory selection pressures for faster development  
58 [9] etc. Body size, weight and wing length are certain parameters that ensure the overall fitness  
59 of organisms including fruit flies. Thus, variations in these phenotypes can be used to understand  
60 the genotypic changes that are bound to occur [10].

61 Fruit flies *Drosophila melanogaster* for the past three decades, has been widely used as a model  
62 organism for studying aging via nutritional approaches including diet restriction (DR), food  
63 dilution, intermittent feeding, etc., [11-13]. The diet of fruit flies commonly comprises of  
64 carbohydrates and proteins as the major source, with lipids, vitamins, minerals present in minor  
65 quantities. Restricting protein source (yeast) in the fly food is a type of dietary implementation  
66 (Protein Restriction; PR henceforth), and is seen to influence a range of fitness and fitness-  
67 related traits such as lifespan, fecundity, stress resistance, activity, development time, etc., [13-  
68 16]. Interestingly, PR is known to influence traits like body size, weight and wing length,  
69 wherein variations in yeast concentration can significantly alter the body size and weight of the  
70 flies, and also have an influence on their wing length in a single generation itself (environment  
71 effect; [1, 2, 17]). This might be due to the sudden change in the protein composition; while it is  
72 necessary to assay long term (genetic effect) effect of PR. A high protein diet can yield  
73 unaffected pupal size [18], while the long duration of high protein increased body mass [19], also  
74 decreased body weight and fat levels [20].

75 PR from pre-adult stage is highly debatable as some studies suggest its negative effect on  
76 lifespan, body size, fecundity [1, 21, 22]; while studies claim its positive effect on lifespan and  
77 other traits [13, 23, 24]. The adult body size need not necessarily influence the lifespan of the  
78 organism raised under varied nutritional conditions [25]. Since, nutrition during pre-adult stage  
79 largely determines the size of the adult upon eclosion [1, 2, 25] alongside the influences of  
80 juvenile hormones [26], it is essential to study the long-term effect of PR and not just one or two

81 generations [27]. Moreover, assaying for one or two generations might address the immediate  
82 effect of parents or grandparents' diet on the off springs and whether it is maternally inherited or  
83 not [28, 29]. The current study assays a trans-generational effect of 20 generations (gen 1, 2, and  
84 20) and does not deal with understanding the mode of inheritance (maternal or paternal).

85 Here we address the effect of 50% and 70% yeast concentrations (as against the control-AL diet)  
86 across generations 1, 2 and 20. This study will address the effect of PR on a single generation, its  
87 off spring (gen 2) and also long-term effect (gen 20) of the corresponding protein restriction. The  
88 assessed traits include body size, weight, relative water content, pupal size and wing length in the  
89 normal and dry conditions of the fly body. After 20 generations of PR implementation, the PR  
90 males and females have lower body weight as compared to their control in their respective  
91 generations and within the PR generations. Interestingly, the relative water content is higher in  
92 females and not males in spite of long-term PR diet. Moreover, the flies at generation 20 have  
93 lower body size as compared to the generations 1 and 2 and their control, showing that the body  
94 size and weight might be positively correlated. Since the body size is an adult trait, we measured  
95 the intermediate pupal size. The PR50 flies at gen 1 and 2 showed the highest pupal size as  
96 compared to PR70 and control, while their size was similar at the end of 20 generations, which  
97 might be reflected as a part of smaller adult body size as well. Lastly, since wing length itself can  
98 be an indicator of body size [30], measuring the same revealed that PR had a diet and generation  
99 dependent effect on producing flies with shorter wings. Thus, after 20 generations, PR diets  
100 produce flies with smaller body and wing, lower weight, unaltered pupal size and relative water  
101 content (in females). Thus, this study would benefit to understand the influence of diet and/or the  
102 genetic effect (generational study) in mediating variations in the assayed traits.

### 103 **Results:**

#### 104 **Normal and dry body weight:-**

105 To check whether the body size and weight are proportional to each other under the imposed  
106 PR, we assayed body weight and size (normal and dry) of the AL and PR stocks at gen 1, 2  
107 and 20 generations of diet imposition. ANOVA followed by post hoc multiple comparisons  
108 using Tukey's test on the normal body weight of the freshly eclosed male and female fruit  
109 flies showed statistically significant effect of diet (D;  $F_{2,72}=193.04$ ,  $p<0.0001$ ), generation  
110 (G;  $F_{2,72}=99.63$ ,  $p<0.0001$ ), sex (S;  $F_{1,72}=490.70$ ,  $p<0.0001$ ) and their interaction (D  $\times$  G  $\times$  S;

111  $F_{4,72}=9.54$ ,  $p<0.0001$ ; Table 1). The results show that PR50 (males) and PR70 (males and  
112 females) have significantly lower body weight at gen 20 as compared to their previous  
113 generations (Fig. 1A); while PR50 females at gen 20 have lower body weight than gen 2, but  
114 not gen 1. The PR50 and PR70 (males and females) have lower body weight at all tested  
115 generations against their respective control. Thus, with PR and long-term restrictions, the  
116 adult body weight is lower. To assess whether this lower body weight is due to the water  
117 content, we weighed the dry weight of the flies.

118 As expected, the ANOVA on the dry body weight of flies revealed statistically significant  
119 effect of D ( $F_{2,72}=106.75$ ,  $p<0.0001$ ), G ( $F_{2,72}=37.78$ ,  $p<0.0001$ ), sex (S;  $F_{1,72}=289.74$ ,  
120  $p<0.0001$ ) and their interaction (D  $\times$  G  $\times$  S;  $F_{4,72}=10.8$ ,  $p<0.0001$ ; Table 1). Post hoc  
121 multiple comparisons by Tukey's test revealed significantly decreased dry body weight of  
122 PR50 (males and females) at gen 20 have lower dry weight as compared to their gen 1, but  
123 not gen 2. Interestingly, PR70 males show no effect of generations as their dry weight is not  
124 different, while PR70 females at gen 20 have lower weight as compared to gen 1 and 2 (Fig.  
125 1B). The effect of diet shows that at gen 1, the PR50 females are lower in weight, while the  
126 others weigh similar to AL. At gen 2, only PR50 females were lower, but surprisingly at gen  
127 20, PR50 and PR70 (males and females) dry weight difference is prominent and weigh lower  
128 than the control. Thus, the results confirm that the body weight of PR flies is lower than the  
129 AL due to long term diet implementation.

130 Since there exists a difference between the normal and dry body weights across generations,  
131 we assessed the relative water content in the PR flies. ANOVA on the relative water content  
132 revealed statistically significant effect of D ( $F_{2,72}=11.4$ ,  $p<0.0001$ ) and its interaction with  
133 generation (D  $\times$  G;  $F_{4,72}=10.38$ ,  $p<0.0001$ ; Table 1), but not G ( $F_{2,72}=3.03$ ,  $p<0.0547$ ), sex  
134 (S;  $F_{1,72}=3.87$ ,  $p<0.0531$ ). The relative water content of the PR50 flies at gen 2 is  
135 comparatively higher than gen 1, while PR70 males and females have higher water content  
136 at gen 1 and 20 respectively (Fig. 1C). For the effect of diet across generations, at gen 1, the  
137 PR50 and PR70 flies are equal to AL, while at generation 2, the PR50 males have similar  
138 water content at that of its respective control, while PR70 males and PR50 females exhibit  
139 lower and higher water content respectively. But interestingly at gen 20, PR males have

140 lower relative water content, while in PR females' it is higher. Thus, long term PR has  
141 facilitated higher water content in PR females and not males.

#### 142 **Normal and dry body size:-**

143 The flies maintained on PR50% and 70% for 20 generations from the pre-adult stage were  
144 measured for their normal and dry body size. ANOVA on the normal body size of the freshly  
145 eclosed adult males and females showed a statistically significant effect of diet (D;  
146  $F_{2,522}=38.5$ ,  $p<0.0001$ ), generation (G;  $F_{2,522}=98.2$ ,  $p<0.0001$ ), sex (S;  $F_{1,522}=611.6$ ,  
147  $p<0.0001$ ) and their interaction (D  $\times$  G;  $F_{4,522}=21.8$ ,  $p<0.0001$ ) (Table 1; Fig. 2A). Further,  
148 post hoc multiple comparisons using Tukey's HSD test revealed the generation effect is  
149 prominent in the PR flies as their body size at gen 20 is comparatively smaller than the  
150 previously tested generations (1 and 2). The effect of diet shows that at gen 1, PR males do  
151 not show any difference in body size, while PR females are smaller. But surprisingly at gen  
152 2, the PR fed males are larger than AL, while females are similar in size as that of AL, while  
153 at gen 20, PR males and females are smaller than the AL flies. Thus, after 20 generations the  
154 PR produces smaller flies as compared to AL even though minor fluctuations in their body  
155 size were observed at gen 1 and 2.

156 Further, ANOVA followed by multiple comparisons by Tukey's HSD test on the dry body  
157 size showed statistically significant effect of D ( $F_{2,522}=21.23$ ,  $p<0.0001$ ), G ( $F_{2,522}=163.13$ ,  
158  $p<0.0001$ ), S ( $F_{1,522}=363.37$ ,  $p<0.0001$ ) and their interaction (D  $\times$  G;  $F_{4,522}=41.12$ ,  $p<0.0001$ ;  
159 Table 1; Fig. 2B). All the PR flies at gen 2 are bigger as compared to gen 1 and 20, except  
160 for PR70 males wherein their dry body size is similar to that observed at gen 1. The effect of  
161 diet on the dry body size revealed that PR flies are similar in size to AL at gen 1, while at  
162 gen 2 the PR70 (males and females) are bigger than AL. Similar to the results of normal  
163 body size, the PR flies are smaller than their control flies at gen 20. Surprisingly, there exist  
164 changes in the response of PR diet on the normal and dry body size, showing that the normal  
165 body size and dry body size might not be equivalent and the difference between them is not  
166 constant, and the reason might be attributed to the various forms of storage reserves.

#### 167 **Pupal size:-**

168 ANOVA followed by Tukey's on the normal wing length showed a statistically significant  
169 effect of D ( $F_{2,261}=29.34$ ,  $p<0.0001$ ), G ( $F_{2,261}=7.96$ ,  $p<0.0004$ ) and their interaction (D  $\times$  G;  
170  $F_{4,261}=5.91$ ,  $p<0.0001$ ; Table 1). Post hoc multiple comparisons by Tukey's test showed that  
171 among PR50 flies across generations, gen 1 was the highest, while at gen 2 and 20 they were  
172 similar. Across diets, PR50 flies had a higher pupal size in gen 1, 2 and gen 20 as compared  
173 to AL and PR70 flies. Thus, showing that the PR50 flies have pupal size higher as compared  
174 to the control in all the generations, but within its own generations, the observed highest  
175 pupal size at generation 1 might have been a startle response for PR.

#### 176 **Normal and dry wing length:-**

177 Post assaying of body size, we intended to assay the wing length as it is commonly thought  
178 to be a measure of body size as mentioned earlier. ANOVA on the normal wing length  
179 showed statistically significant effect of D ( $F_{2,522}=72.28$ ,  $p<0.0001$ ), G ( $F_{2,522}=28.07$ ,  
180  $p<0.0001$ ), S ( $F_{1,522}=301.92$ ,  $p<0.0001$ ) and their interaction (D  $\times$  G;  $F_{4,522}=10.6$ ,  $p<0.0001$ ;  
181 Table 1). Interestingly, multiple comparisons by Tukey's test within diets across generations  
182 shows that gen 20 females have wing length similar to gen 2, while the males have lower  
183 wing length compared to gen 2. Moreover, PR50 females have smaller wing length as  
184 compared to AL in all tested generations; while PR70 females have smaller wings as  
185 compared to AL in the first generation alone (Fig. 3A). The effect of diet shows that PR flies  
186 (males and females) have shorter wings than AL flies at gen 20. Thus, the concept of wing  
187 length as a measure for body size might not hold true in the presence of dietary parameters  
188 influencing them across generations.

189 ANOVA on dry wing length of fruit flies revealed significant effect of D ( $F_{2,522}=13.46$ ,  
190  $p<0.0001$ ), G ( $F_{2,522}=33.84$ ,  $p<0.0001$ ), S ( $F_{1,522}=112.05$ ,  $p<0.0001$ ) and their interaction (D  $\times$  G;  
191  $F_{4,522}=26.19$ ,  $p<0.0001$ ; Table 1). Multiple comparisons of dry wing length by Tukey's test  
192 revealed results similar to the normal wing length wherein PR flies at gen 20 had significantly  
193 smaller wings than the control (Fig. 3B). Thus, even though PR yield flies with shorter wings at  
194 the end of 20 generations (similar to dry body size), it is not true across generations.

#### 195 **Discussion:-**

#### 196 **Normal and dry body weight:-**

197 Our results are similar to the results of Vijendravarma et al., [28] that show the effect of diet  
198 (parental) on different traits (including body weight) of fruit flies, and it also suggests that  
199 these observed differences might be due to the maternal effects and the long-term DR  
200 imposition. Further, we did not expect variations in the AL body weight across generations,  
201 and convincingly their body weight and relative water content were unaffected, thereby  
202 providing convincing results for the control flies. In the PR50 and 70% flies, there might be  
203 due to the effect of parental diet on the normal body weight of the flies as suggested  
204 elsewhere [28, 29], because the PR flies showed lower body weight at the end of 20  
205 generations. Moreover, the lower body weight of PR flies after 20 generations can be  
206 thought to be in line with the study of Kristensen et al., [19], which reported the protein-rich  
207 diet for 17 generations yielded bigger and thereby fatter flies as compared to the control.  
208 Interestingly, the dry weight of PR males is more stable than the females and is in line with  
209 the study reported elsewhere [6]. Thus, long term PR implementation suggests the existence  
210 of a plastic response to diet as compared to the genetic effect in case of dry weight and sex  
211 [19].

#### 212 **Body size and Pupal size:-**

213 The body size of the PR flies is smaller at generation 20 as compared to their previous  
214 generations and control. These results are contrary to the study of Chippindale et al., [31],  
215 which reported that bigger adult body size is associated with increased fitness of the flies.  
216 Since the fitness of the organism is assessed based on its reproductive capacity and ability to  
217 withstand stress, our results might have a positive effect in spite of smaller body size.  
218 Surprisingly, the flies with large body size exhibit lower larval viability even though they  
219 appear to contribute to the adult fitness [32]. Since the females that mated with smaller males  
220 appeared more fecund and also copulated longer [33], the duration of copulation and  
221 offspring number are dependent on the female body size and inversely related to the male  
222 body size [33, 34]. Moreover, even though the large females differ in size as compared to the  
223 smaller females, does not guarantee significant difference in their ovariole number [34], even  
224 though yeast restriction reduces ovariole number [25] and high protein diet is known to  
225 increase the same with a possible trade-off in egg to adult viability in *D. ananassae* [15].  
226 Since, the males of *D. melanogaster* prefer smaller females for first mating and then undergo



227 adaptive discrimination [35] or plasticity for mate selection by males [36], we can conclude  
228 that body size may be one of the many traits that are assessed to choose a potential mate but  
229 not a primary one. Hence, the smaller body size of the PR flies might not be a threat for its  
230 mate choice, reproductive successor larval viability in our study, even though the fecundity  
231 of our flies remains to be tested.

232 The pupal size at PR50 flies recorded the highest size as compared to the control and PR70  
233 flies, while gen 1 flies of PR50 yielded highest pupal size compared to gen 20. Since high  
234 protein diet did not confer any change in the pupal size of the flies, but high carbohydrate  
235 diet resulted in smaller pupa [18], it is surprising to see pupal size difference upon protein  
236 restriction. This is in line with the results of Deas et al., [37], that suggests more  
237 susceptibility of pupal mass change in poor diet than that of rich nutrient diet, in addition to  
238 exhibiting effects of parental and grandparental diet [37]. Overall, our results also show that  
239 diet and generation have a differential role of different traits as suggested elsewhere [37].

#### 240 **Normal and dry wing length:-**

241 The concentrations of nutrients (yeast and sugar) in the fly diet play an important role in the  
242 wing length of females than in males [17]. In our study, since the concentration of sugar was  
243 kept constant, the observed variations in wing length show that the yeast alone can modulate this  
244 trait. The PR flies showed smaller wings after 20 generations while there existed variable results  
245 based on sex. This is contrary to the report of Güler et al., [17], who stated that female's wing  
246 length varies with yeast manipulations while males vary with sugar level variations. There are  
247 various other factors capable of modulating wing length like temperature and latitudinal clines  
248 [3, 38], wherein care was taken to avoid such temperature perturbations. It is also seen that wing  
249 length (similar to that of body size) can be influenced by altitude in *Drosophila* species [39, 40].  
250 There exists a difference in the PR and generation effect on the trend of body size and wing  
251 length variations and probably, is in contrast to the study of Sokoloff [30], which stated that wing  
252 length can serve as a parameter for estimating fly's body size.

#### 253 **Materials and methods:**

##### 254 **Fly culture and maintenance:-**

255 The control and DR imposed flies are maintained on 21-day discrete generation cycles with egg  
256 collection done exactly on the 21<sup>st</sup> day of the previous generation cycle. The control flies are fed  
257 with AL (*Ad Libitum*) food, while the PR stocks are fed with 50% and 70% yeast as compared to  
258 the control (PR50% and PR70%; henceforth). The egg collection for control and PR stocks are  
259 done in their respective AL and PR diets (AL diet but with 50% and 70% yeast for PR50 and  
260 PR70 stocks respectively). The flies upon eclosion are transferred to plexi-glass cages (25 cm ×  
261 20 cm × 15 cm) and are supplemented with their corresponding food. For the following  
262 experiments, approximately 30-40 eggs per vial were collected for control and PR and  
263 maintained at the temperature of ~25 °C (±0.5 °C), the humidity of ~70 %, the light intensity of  
264 ~250 lux in 12:12 hr Light/Dark cycles. The diet manipulations were done only in the yeast  
265 concentration present in the control food, wherein we used instant dry yeast from Gloripan.

#### 266 **Normal body weight and dry weight:-**

267 We measured the normal and dry body weight of freshly eclosed flies collected in every 2 hr  
268 intervals. The eggs were collected from the DR stocks over a 2 h window and kept under  
269 LD12:12 h. Post eclosion, the virgin male and female flies were separated by anesthetizing with  
270 CO<sub>2</sub>. For weighing the normal body weight, flies were weighed post anesthetization using ether  
271 (to maintain the flies in the anesthetized state for longer duration), after which the flies were  
272 discarded. For the dry body weight assay, the virgin males and females were killed by freezing  
273 and were dried for 36 h at 70°C as per the protocol followed elsewhere (Yadav and Sharma,  
274 2014). The normal and dry body weight assay was assessed by weighing a group of 10 males or  
275 10 females per vial, and 5 such vials of randomly chosen flies from the control and the DR  
276 stocks were weighed. The body weight of flies was measured using a weighing balance from  
277 UniBloc (Shimadzu) AUX220. The relative water content of the flies was calculated by dividing  
278 the water content (normal body weight-dry weight) by the normal body weight of the flies as  
279 reported elsewhere (Robinson et al., 2000).

#### 280 **Body size/length and wing length:-**

281 The protocol for egg collection until the separation of virgin male and female flies for this assay  
282 is similar to that followed for body weight assay. The flies' body size and wing length were  
283 measured under a microscope, wherein 30 virgin males and females from the control and DR  
284 stocks were assayed. The body size and the wing length of the anesthetized males and females

285 were measured using a microscope from Olympus with a normal ruler (least count 0.5 mm).

286 **Acknowledgments:-**

287 We thank Dr. Usha Nagarajan, Fly Lab, SASTRA Deemed to be University for the microscope  
288 facility for measuring body size and wing length. We thank N. Ramesh (SASTRA University)  
289 for helping us with population maintenance.

290 **Competing interests:-**

291 The authors declare that they have no conflict of interest.

292 **Author contributions:-**

293 S. K. & P. Y. conceived and designed the experiments; S. K. performed the experiments,  
294 analyzed the data and wrote initial versions of the manuscript. S. K. & P. Y. corrected, read and  
295 approved the final version of the manuscript.

296 **Funding:-**

297 S. K. acknowledges the Department of Science and Technology- Government of India, for the  
298 INSPIRE fellowship (IF170750). P. Y. acknowledges the Science and Engineering Research  
299 Board (File no- YSS/2015/000354), Department of Science and Technology- Government of  
300 India, India for the financial support and SASTRA Deemed to be University, Thanjavur (TN),  
301 India for the infrastructure.

302 **References:-**

- 303 1) F. W. Robertson, The ecological genetics of growth in *Drosophila*. 1. Body size and  
304 development time on different diets. *Genetic Res.* **1**, 288–304 (1960).
- 305 2) F. W. Robertson, The ecological genetics of growth in *Drosophila* 6. The genetic  
306 correlation between the duration of the larval period and body size in relation to larval diet.  
307 *genetics Res.* **4**, 74 –92 (1963).
- 308 3) G. H. de Moed, G. De Jong, W. Scharloo, Environmental effects on body size variation in  
309 *Drosophila melanogaster* and its cellular basis. *Genet Res.* **70**, 35 –43 (1997).
- 310 4) P. Klepsatel, E. Procházka, M. Gálíková, Crowding of *Drosophila* larvae affects lifespan  
311 and other life-history traits via reduced availability of dietary yeast. *Exp. Gerontol.* **110**, 298  
312 –308 (2018).

- 313 5) L. Nunney, W. Cheung, The effect of temperature on body size and fecundity in female  
314 *Drosophila melanogaster*: Evidence for adaptive plasticity. *Evolution*. **51**, 1529 –1535  
315 (1997).
- 316 6) D. Karan, J. P. Morina, B. Moreteau, J. R. David, Body size and developmental  
317 temperature in *Drosophila melanogaster*: analysis of body weight reaction norm. *J. Therm.*  
318 *Biol.* **23**, 301 –309 (1998).
- 319 7) R. S. Miller, J. L. Thomas, The Effects of Larval Crowding and Body Size on the Longevity  
320 of Adult *Drosophila Melanogaster*. *Ecology*. **39**, 118 (1958).
- 321 8) S. J. W. Robinson, B. Zwaan, L. Partridge, Starvation resistance and adult body  
322 composition in a latitudinal cline of *Drosophila melanogaster*. *Evolution*. **54**, 1819–1824  
323 (2000).
- 324 9) P. Yadav, V. K. Sharma, Correlated changes in life history traits in response to selection for  
325 faster pre-adult development in the fruit fly *Drosophila melanogaster*. *J. Exp. Biol.* **217**,  
326 580–589 (2014).
- 327 10) K. G. Ormerod, O. K. LePine, P. S. Abbineni, J. M. Bridgeman, J. R. Coorsen, A. J.  
328 Mercier, G. J. Tattersall, *Drosophila* development, physiology, behavior, and lifespan are  
329 influenced by altered dietary composition. *Fly (Austin)*. **11**, 153–170 (2017).
- 330 11) T. M. Bass, R. C. Grandison, R. Wong, P. Martinez, L. Partridge, M. D. Piper,  
331 Optimization of dietary restriction protocols in *Drosophila*. *J. Gerontol. A Biol. Sci. Med.*  
332 *Sci.* **62**, 1071–1081 (2007).
- 333 12) R. C. Grandison, R. Wong, T. M. Bass, L. Partridge, M. D. Piper, Effect of a standardised  
334 dietary restriction protocol on multiple laboratory strains of *Drosophila melanogaster*.  
335 *PLoS One*. **4**, e4067 (2009).
- 336 13) S. D. Katewa, F. Demontis, M. Kolipinski, A. Hubbard, M. S. Gill, N. Perrimon, S. Melov,  
337 P. Kapahi, Intramyocellular fatty-acid metabolism plays a critical role in mediating  
338 responses to dietary restriction in *Drosophila melanogaster*. *Cell Metab.* **16**, 97–103 (2012).
- 339 14) T. Chapman, L. Partridge, Female fitness in *Drosophila melanogaster*: an interaction  
340 between the effect of nutrition and of encounter rate with males. *Proc. Biol. Sci.* **263**, 755 –  
341 759 (1996).
- 342 15) S. Sisodia, B. N. Singh, Experimental evidence for nutrition regulated stress resistance in  
343 *Drosophila ananassae*. *PLoS One*. **7**, e46131 (2012).

- 344 16) S. Krittika, A. Lenka, P. Yadav, Evidence of dietary protein restriction regulating pupation  
345 height, development time and lifespan in *Drosophila melanogaster*. *Biol. Open*. **8**,  
346 bio042952 (2019).
- 347 17) P. Güler, N. Ayhan, C. Kosukcu, B. S. Önder, The effects of larval diet restriction on  
348 developmental time, pre adult survival, and wing length in *Drosophila melanogaster*. *Turk.*  
349 *J. Zool.* **39**, 395–403 (2015).
- 350 18) T. Reis, Effects of Synthetic Diets Enriched in Specific Nutrients on *Drosophila*  
351 Development, Body Fat, and Lifespan. *PLoS One*. **11**, e0146758 (2016).
- 352 19) T. N. Kristensen, J. Overgaard, V. Loeschcke, D. Mayntz, Dietary protein content affects  
353 evolution for body size, body fat and viability in *Drosophila melanogaster*. *Biol. Lett.* **7**,  
354 269–272 (2011).
- 355 20) S. N. Morris, C. Coogan, K. Chamseddin, S. O. Fernandez-Kim, S. Kolli, J. N. Keller, J. H.  
356 Bauer, Development of diet-induced insulin resistance in adult *Drosophila melanogaster*.  
357 *Biochim Biophys Acta*. **1822**, 1230–1237 (2012).
- 358 21) J. Hodin, L. M. Riddiford, Different mechanisms underlie phenotypic plasticity and  
359 interspecific variation for a reproductive character in Drosophilids (Insecta: Diptera).  
360 *Evolution*. **54**, 1638–1653 (2000).
- 361 22) R. M. Udugade, A. A. Deshmukh, K. A. Gajare, Dietary Restriction Initiated from Larval  
362 Stage Decreases Maximum Life Span in *Drosophila melanogaster*. *IORS-JPBS*. **6**, 37–42  
363 (2016).
- 364 23) C. M. May, A. Doroszuk, B. J. Zwaan, The effect of developmental nutrition on life span  
365 and fecundity depends on the adult reproductive environment in *Drosophila melanogaster*.  
366 *Ecol. Evol.* **5**, 1156–1168 (2015).
- 367 24) M. Stefana, P. C. Driscoll, F. Obata, A. R. Pengelly, C. L. Newell, J. I. MacRae, A. P.  
368 Gould, Developmental diet regulates *Drosophila* lifespan via lipid autotoxins.  
369 *Nat. Commun.* **8**, 1384 (2017).
- 370 25) M. P. Tu, M. Tatar, Juvenile diet restriction and the aging and reproduction of adult  
371 *Drosophila melanogaster*. *Aging Cell*. **2**, 327–333 (2003).
- 372 26) C. K. Mirth, H. Y. Tang, S. C. Makohon-Moore, S. Salhadar, R. H. Gokhale, R. D. Warner,  
373 T. Koyama, L. M. Riddiford, A. W. Shingleton, JH controls body size by altering growth  
374 rate. *PNAS USA*. **111**, 7018–7023 (2014).

- 375 27) L. M. Matzkin, S. Johnson, C. Paight, T. A. Markow, Preadult parental diet affects  
376 offspring development and metabolism in *Drosophila melanogaster*. *PLoS One*. **8**, e59530  
377 (2013).
- 378 28) R. K. Vijendravarma, S. Narasimha, T. J. Kawecki, Effects of parental larval diet on egg  
379 size and offspring traits in *Drosophila*. *Biol. Lett.* **6**, 238–241(2010).
- 380 29) T. M. Valtonen, K. Kangassalo, M. Pölkki, M. J. Rantala, Transgenerational effects of  
381 parental larval diet on offspring development time, adult body size and pathogen resistance  
382 in *Drosophila melanogaster*. *PLoS One*. **7**, e31611 (2012).
- 383 30) A. Sokoloff, Morphological variation in natural and experimental populations of  
384 *Drosophila pseudoobscura* and *Drosophila persimilis*. *Evolution*. **20**, 49–71 (1966).
- 385 31) A. K. Chippindale, T. J. F. Chu, M. R. Rose, Complex trade-offs and the evolution of  
386 starvation resistance in *Drosophila melanogaster*. *Evolution*. **50**, 753–766 (1996).
- 387 32) L. Partridge, K. Fowler, Responses and correlated responses to artificial selection on thorax  
388 length in *Drosophila melanogaster*. *Evolution*. **47**, 213–226 (1993).
- 389 33) S. Pitnick, Male size influences mate fecundity and remating interval in *Drosophila*  
390 *melanogaster*. *Anim. Behav.* **41**, 735–745 (1991).
- 391 34) A. Lefranc, J. Bundgaard, The influence of male and female body size on copulation  
392 duration and fecundity in *Drosophila melanogaster*. *Hereditas*. **132**, 243–247 (2000).
- 393 35) P. G. Byrne, W. R. Rice, Evidence for adaptive male mate choice in the fruit fly  
394 *Drosophila melanogaster*. *Proc. Biol. Sci.* **273**, 917–922 (2006).
- 395 36) D. A. Edward, T. Chapman, Variation in male mate choice in *Drosophila melanogaster*.  
396 *PLoS One*. **8**, e56299 (2013).
- 397 37) J. B. Deas, L. Blondel, C. G. Extavour, Ancestral and offspring nutrition interact to affect  
398 life-history traits in *Drosophila melanogaster*. *Proc. Biol. Sci.* **286**, 20182778 (2019).
- 399 38) J. R. David, R. Allemand, J. Van Herrewege, Y. Cohet, “Ecophysiology: abiotic factors” in  
400 The Genetics and Biology of *Drosophila*, M. Ashburner, H. L. Carson, J. N. Thompson Jr,  
401 Eds. (Academic Press, London, 1983), pp. 105–170.
- 402 39) H. D. Stalker, H. L. Carson, An altitudinal transect of *Drosophila robusta* Sturtevant.  
403 *Evolution*. **2**, 295–305 (1948).

404 40) A. O. Tantawy, Studies on natural populations of *Drosophila*. III. Morphological and  
405 genetic differences of wing length in *Drosophila melanogaster* and *D. simulans* in relation  
406 to season. *Evolution*. **18**, 560–570 (1965).

407

408 **Figure Legends:-**

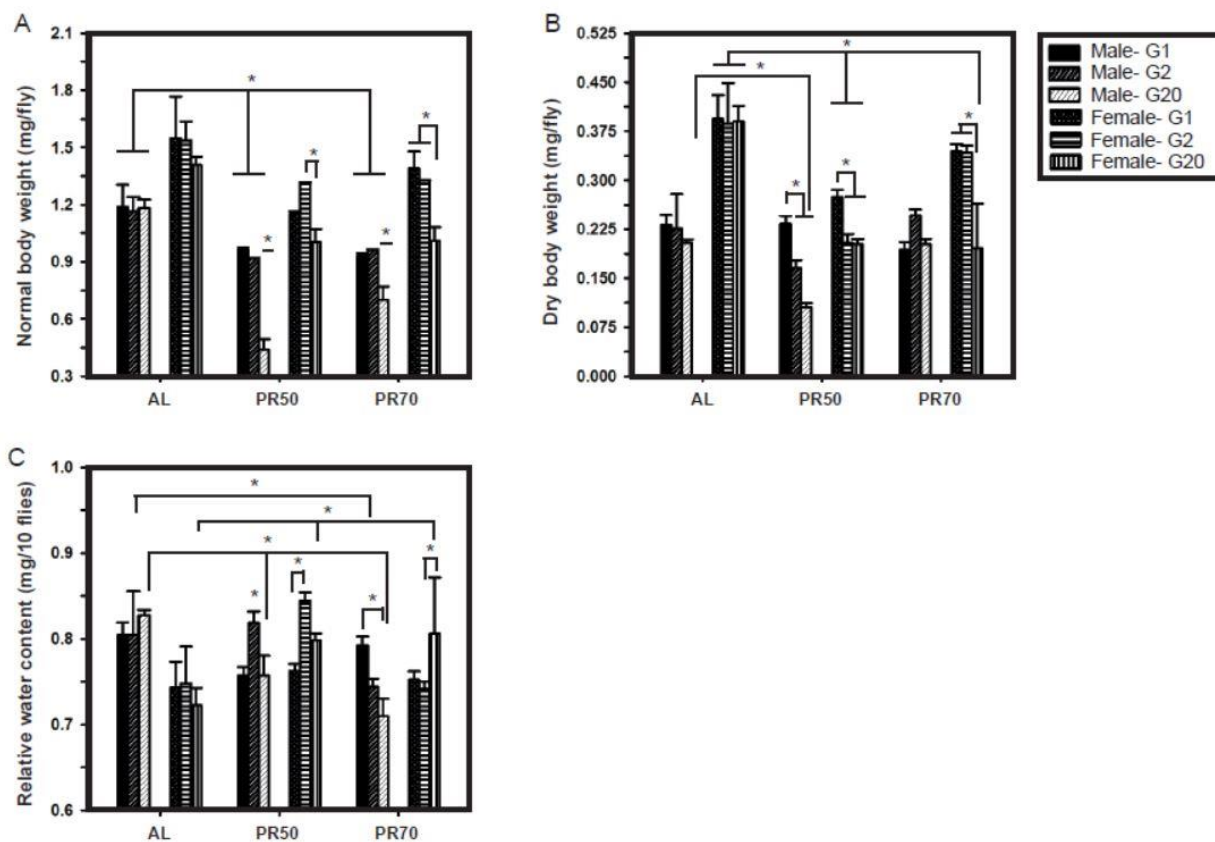

409

410 **Figure 1: Low weighed males and females under the PR diet for 20 generations.** The  
411 normal (A) and dry (B) body weight of the flies (varying across generations), shows PR flies  
412 weighing lower than that of AL flies at the end of generation 20. The effect of diet pertaining  
413 to the relative water content (C) is prominent, wherein after 20 generations of PR diets, male  
414 and female flies possessed lower and higher water content as compared to AL respectively.  
415 The graph represents diet in the *x*-axis and body weight (A, B), relative water content (C) in  
416 the *y*-axis. The bars and error bars are represented as the mean  $\pm$  standard deviation (SD).  
417 The asterisks on the bars indicate significance levels wherein *p*-value is <0.05. G1, G2 and  
418 G20 represent generation 1, 2, and 20 respectively.

419

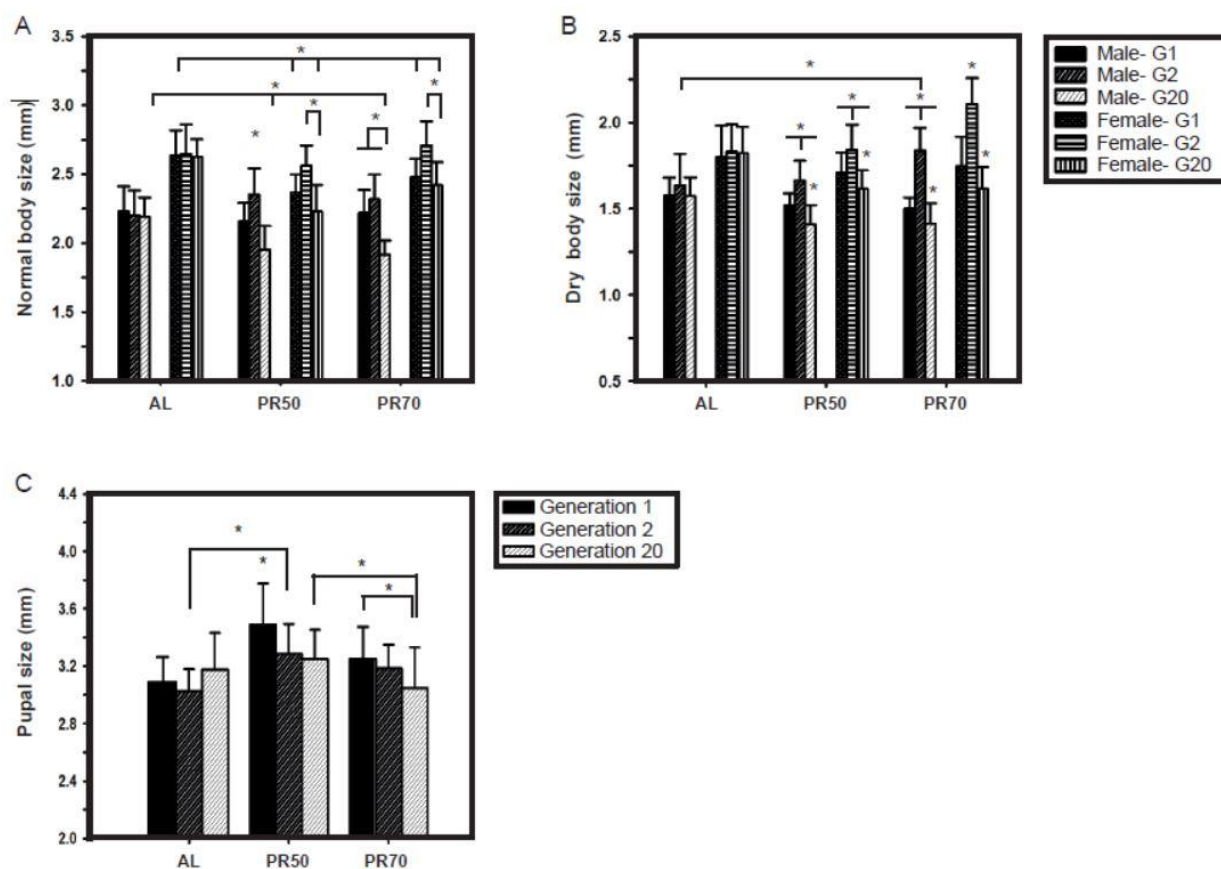

420

421 **Figure 2: Smaller flies and unaltered pupal size due to the PR diet for 20 generations.**

422 The effect of diet and generation on the normal (A) and dry (B) body size of the flies are  
423 variable, wherein the normal body size of PR flies is lower than their control at the end of  
424 the 20 generations. The pupal size (C) of PR50 flies were the highest at gen 1 as compared to  
425 PR70 and control, but after 20 generations were similar to AL. The graph represents diet in  
426 the *x*-axis and body size (A, B), pupal size (C) in the *y*-axis. All other details are the same as  
427 in Figure 1.



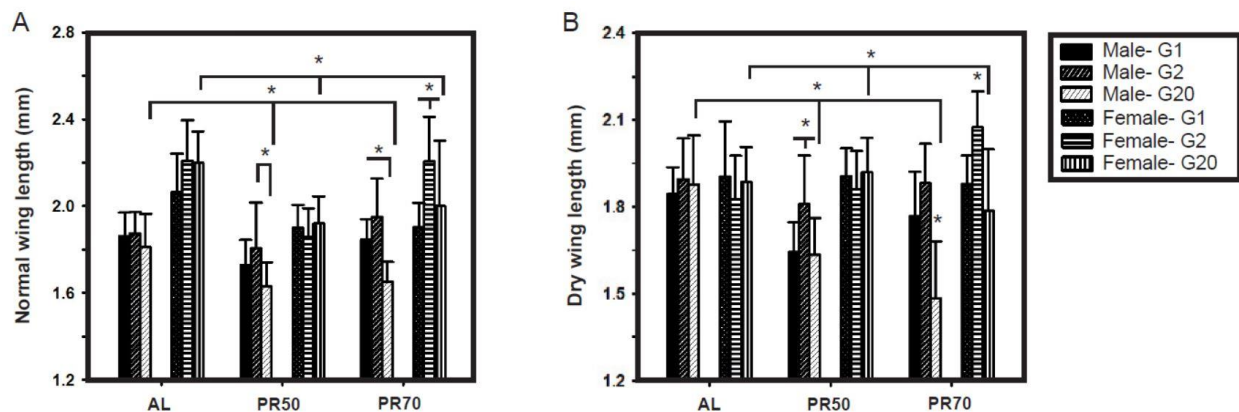

428

429 **Figure 3: Reduced wing length of flies due to long-term PR diet imposition.** The normal  
 430 (A) and dry wing length (B) of the PR flies are smaller than the AL flies post 20 generations,  
 431 but the pattern of variations across generation is different from that witnessed for body size.  
 432 The graph represents diet in the *x*-axis and wing length on the *y*-axis. All other details are the  
 433 same as in Figure 1.

434

435 **Table 1:** ANOVA details of the normal and dry body weight, size, pupal size and wing length of  
 436 long-term PR imposed flies.

437

| Assay              | Effect                       | d.f. | MS effect | d.f. error | MS error | <i>F</i> | <i>P</i> < |
|--------------------|------------------------------|------|-----------|------------|----------|----------|------------|
| Normal body weight | Diet (D)                     | 2    | 114.29    | 72         | 0.59     | 193.04   | 0.0001     |
|                    | Gen (G)                      | 2    | 58.99     | 72         | 0.59     | 99.63    | 0.0001     |
|                    | Sex (S)                      | 1    | 290.52    | 72         | 0.59     | 490.7    | 0.0001     |
|                    | Diet × Gen (D × G)           | 4    | 8.65      | 72         | 0.59     | 14.61    | 0.0001     |
|                    | Diet × Sex (D × S)           | 2    | 0.88      | 72         | 0.59     | 1.48     | 0.2342     |
|                    | Gen × Sex (G × S)            | 2    | 0.34      | 72         | 0.59     | 0.57     | 0.5654     |
|                    | Diet × Gen × Sex (D × G × S) | 4    | 5.65      | 72         | 0.59     | 9.54     | 0.0001     |
| Dry body weight    | Diet (D)                     | 2    | 8.7003    | 72         | 0.0815   | 106.75   | 0.0001     |
|                    | Gen (G)                      | 2    | 3.079     | 72         | 0.0815   | 37.78    | 0.0001     |

|                              |                                 |   |        |     |         |        |        |
|------------------------------|---------------------------------|---|--------|-----|---------|--------|--------|
|                              | Sex (S)                         | 1 | 23.61  | 72  | 0.0815  | 289.74 | 0.0001 |
|                              | Diet × Gen (D × G)              | 4 | 1.015  | 72  | 0.0815  | 12.46  | 0.0001 |
|                              | Diet × Sex (D × S)              | 2 | 2.607  | 72  | 0.0815  | 31.99  | 0.0001 |
|                              | Gen × Sex (G × S)               | 2 | 0.13   | 72  | 0.0815  | 1.61   | 0.2064 |
|                              | Diet × Gen × Sex<br>(D × G × S) | 4 | 0.88   | 72  | 0.0815  | 10.8   | 0.0001 |
| Relative<br>Water<br>content | Diet (D)                        | 2 | 0.0077 | 72  | 0.00068 | 11.4   | 0.0001 |
|                              | Gen (G)                         | 2 | 0.002  | 72  | 0.00068 | 3.03   | 0.0547 |
|                              | Sex (S)                         | 1 | 0.0026 | 72  | 0.00068 | 3.87   | 0.0531 |
|                              | Diet × Gen (D × G)              | 4 | 0.0070 | 72  | 0.00068 | 10.38  | 0.0001 |
|                              | Diet × Sex (D × S)              | 2 | 0.0225 | 72  | 0.00068 | 33.3   | 0.0001 |
|                              | Gen × Sex (G × S)               | 2 | 0.0035 | 72  | 0.00068 | 5.12   | 0.0083 |
|                              | Diet × Gen × Sex<br>(D × G × S) | 4 | 0.0057 | 72  | 0.00068 | 8.46   | 0.0001 |
| Normal<br>body size          | Diet (D)                        | 2 | 1.036  | 522 | 0.027   | 38.5   | 0.0001 |
|                              | Gen (G)                         | 2 | 2.641  | 522 | 0.027   | 98.2   | 0.0001 |
|                              | Sex (S)                         | 1 | 16.45  | 522 | 0.027   | 611.6  | 0.0001 |
|                              | Diet × Gen (D × G)              | 4 | 0.586  | 522 | 0.027   | 21.8   | 0.0001 |
|                              | Diet × Sex (D × S)              | 2 | 0.471  | 522 | 0.027   | 17.5   | 0.0001 |
|                              | Gen × Sex (G × S)               | 2 | 0.143  | 522 | 0.027   | 5.3    | 0.0052 |
|                              | Diet × Gen × Sex<br>(D × G × S) | 4 | 0.056  | 522 | 0.027   | 2.1    | 0.083  |
| Dry body<br>size             | Diet (D)                        | 2 | 0.374  | 522 | 0.018   | 21.23  | 0.0001 |
|                              | Gen (G)                         | 2 | 2.870  | 522 | 0.018   | 163.13 | 0.0001 |
|                              | Sex (S)                         | 1 | 6.394  | 522 | 0.018   | 363.37 | 0.0001 |
|                              | Diet × Gen (D × G)              | 4 | 0.724  | 522 | 0.018   | 41.12  | 0.0001 |
|                              | Diet × Sex (D × S)              | 2 | 0.025  | 522 | 0.018   | 1.42   | 0.2438 |
|                              | Gen × Sex (G × S)               | 2 | 0.0004 | 522 | 0.018   | 0.03   | 0.9729 |
|                              | Diet × Gen × Sex<br>(D × G × S) | 4 | 0.015  | 522 | 0.018   | 0.86   | 0.4907 |

|                    |                              |   |       |     |       |        |        |
|--------------------|------------------------------|---|-------|-----|-------|--------|--------|
| Pupal size         | Diet (D)                     | 2 | 1.452 | 261 | 0.049 | 29.34  | 0.0001 |
|                    | Gen (G)                      | 2 | 0.394 | 261 | 0.049 | 7.96   | 0.0004 |
|                    | Diet × Gen (D × G)           | 4 | 0.292 | 261 | 0.049 | 5.91   | 0.0001 |
| Normal wing length | Diet (D)                     | 2 | 1.757 | 522 | 0.024 | 72.28  | 0.0001 |
|                    | Gen (G)                      | 2 | 0.682 | 522 | 0.024 | 28.07  | 0.0001 |
|                    | Sex (S)                      | 1 | 7.338 | 522 | 0.024 | 301.92 | 0.0001 |
|                    | Diet × Gen (D × G)           | 4 | 0.258 | 522 | 0.024 | 10.6   | 0.0001 |
|                    | Diet × Sex (D × S)           | 2 | 0.223 | 522 | 0.024 | 9.19   | 0.0001 |
|                    | Gen × Sex (G × S)            | 2 | 0.453 | 522 | 0.024 | 18.62  | 0.0001 |
|                    | Diet × Gen × Sex (D × G × S) | 4 | 0.112 | 522 | 0.024 | 4.6    | 0.0012 |
| Dry wing length    | Diet (D)                     | 2 | 0.287 | 522 | 0.021 | 13.46  | 0.0001 |
|                    | Gen (G)                      | 2 | 0.723 | 522 | 0.021 | 33.84  | 0.0001 |
|                    | Sex (S)                      | 1 | 2.393 | 522 | 0.021 | 112.05 | 0.0001 |
|                    | Diet × Gen (D × G)           | 4 | 0.559 | 522 | 0.021 | 26.19  | 0.0001 |
|                    | Diet × Sex (D × S)           | 2 | 0.608 | 522 | 0.021 | 28.49  | 0.0001 |
|                    | Gen × Sex (G × S)            | 2 | 0.224 | 522 | 0.021 | 10.51  | 0.0001 |
|                    | Diet × Gen × Sex (D × G × S) | 4 | 0.114 | 522 | 0.021 | 5.33   | 0.0003 |

438

439

440
